# Supplementary material for: Canada’s human footprint reveals large intact areas juxtaposed against areas under immense anthropogenic pressure
Source: Atypon-hosted journal article supplement (doi:10.1139/facets-2021-0063), 2022-01-01

## Supplementary 2

Comparison between the Canadian human footprint (a) and the Global human footprint clipped to Canada (b).

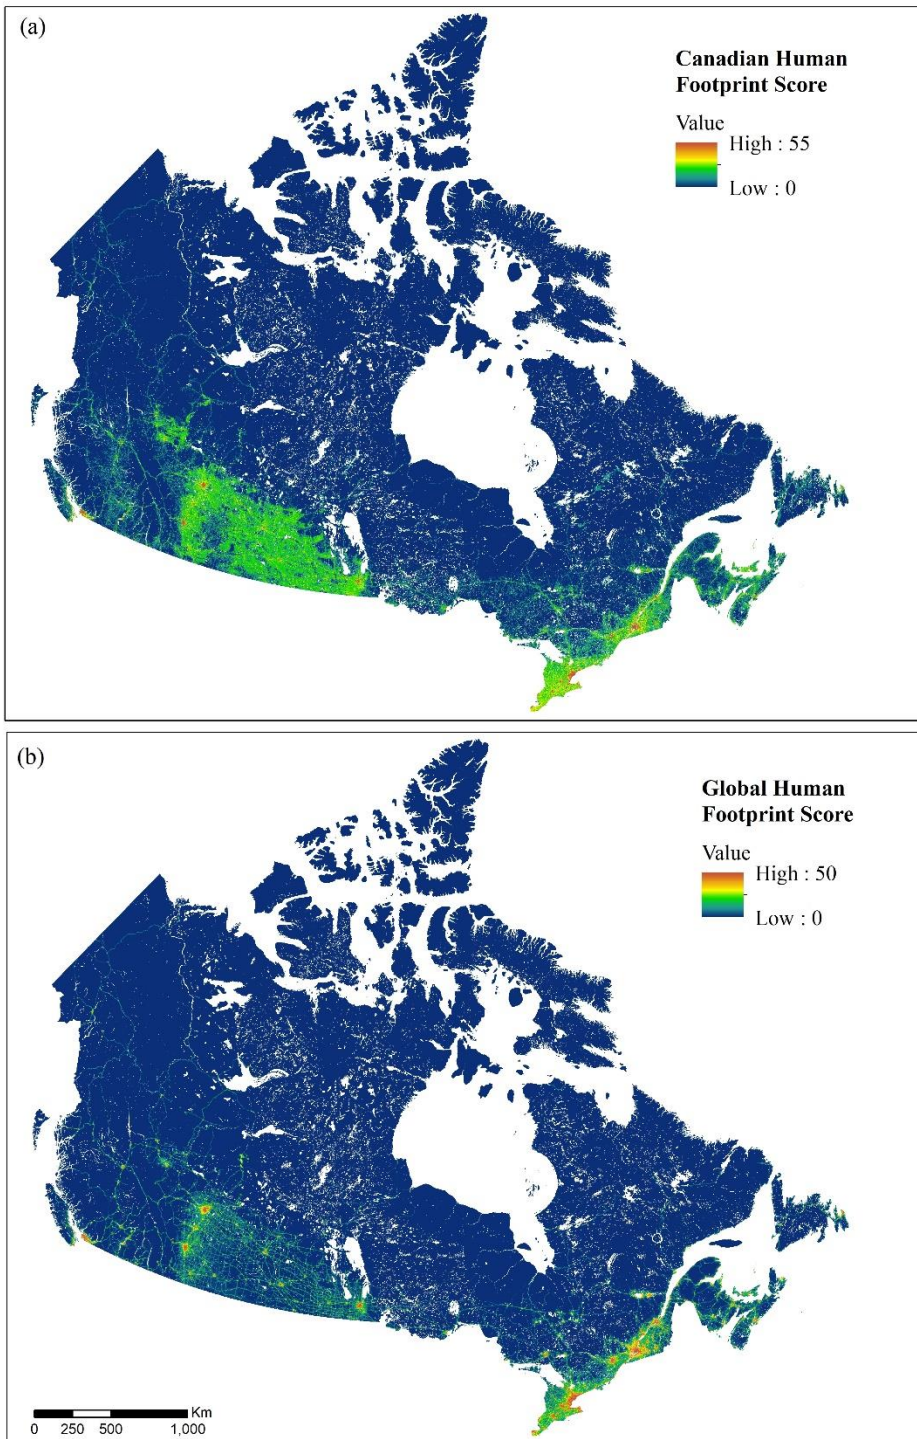

Supplement: facets-2021-0063_supplement2.pdf [file facets-2021-0063_supplement2.pdf]
