# Supplementary material for: Canada’s human footprint reveals large intact areas juxtaposed against areas under immense anthropogenic pressure
Source: Atypon-hosted journal article supplement (doi:10.1139/facets-2021-0063), 2022-01-01

### Supplementary 3

Sensitivity analysis of the Cohen Kappa Statistic (y-axis) with the Percent Agreement (x-axis) between visual score and Canadian human footprint value. The strength of agreement ranges, appearing as the coloured dashed lines, are as defined by Landis & Koch (1977).

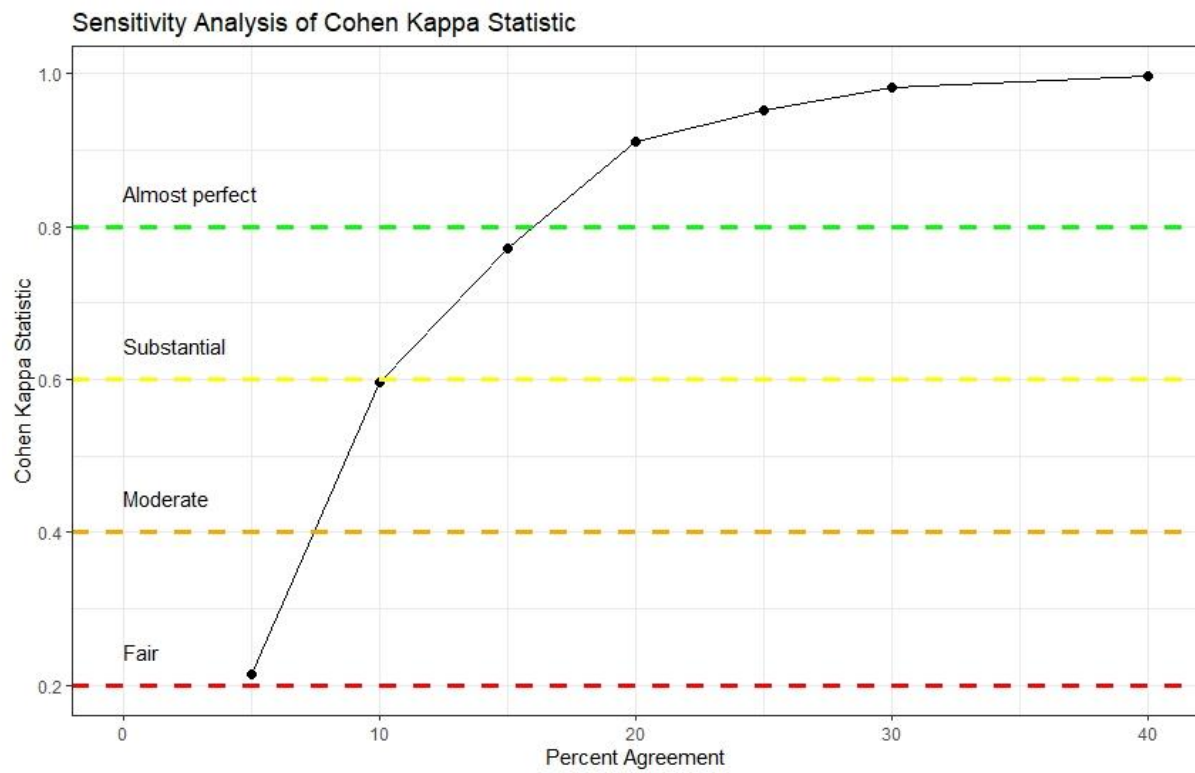

Supplement: facets-2021-0063_supplement3.pdf [file facets-2021-0063_supplement3.pdf]
