# Supplementary material for: Canada’s human footprint reveals large intact areas juxtaposed against areas under immense anthropogenic pressure
Source: Atypon-hosted journal article supplement (doi:10.1139/facets-2021-0063), 2022-01-01
Supplement: facets-2021-0063_supplement4.pdf [file facets-2021-0063_supplement4.pdf]

#### Supplementary 4

The twelve anthropogenic pressures were reclassified into the first level of classification for the IUCN – CMP Unified Classification of Direct Threats. In brackets are the numbers associated with the threat type.

| <b>Pressure</b>                       | <b>Type of classification</b>            |
|---------------------------------------|------------------------------------------|
| <b>Built environments</b>             | Residential & Commercial Development (1) |
| <b>Crop land</b>                      | Agriculture & Aquaculture (2)            |
| <b>Pasture land</b>                   | Agriculture & Aquaculture (2)            |
| <b>Human population density</b>       | Human Intrusions & Disturbance (6)       |
| <b>Nighttime lights</b>               | Residential & Commercial Development (1) |
| <b>Railways</b>                       | Transportation & Service Corridors (4)   |
| <b>Roads</b>                          | Transportation & Service Corridors (4)   |
| <b>Navigable waterways</b>            | Transportation & Service Corridors (4)   |
| <b>Dams and associated reservoirs</b> | Natural System Modification (7)          |
| <b>Mining activity</b>                | Energy Production & Mining (3)           |
| <b>Oil and gas</b>                    | Energy Production & Mining (3)           |
| <b>Forestry</b>                       | Biological Resource Use (5)              |
